# Supplementary material for: Catalytic fast pyrolysis of biomass: the reactions of water and aromatic intermediates produces phenols
Source: Royal Society of Chemistry journal article supplement (doi:10.1039/c5gc00805k), 2015-01-01
Supplement: c5gc00805k1.pdf [file c5gc00805k1.pdf]

## Supplementary Information

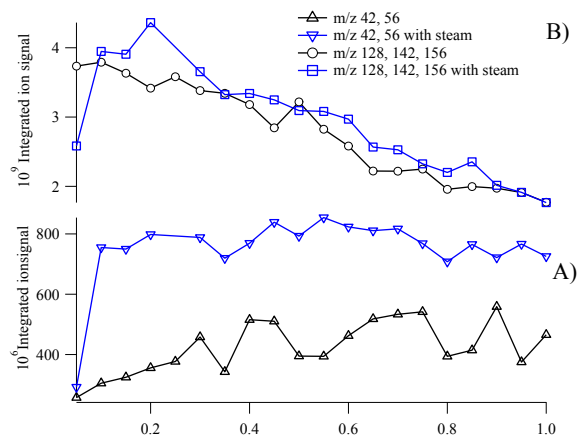

Figure S1. Integrated ion signals (Yields) of selected mass spectral peaks from CFP of 20 samples, each containing 50 mg of pine, and the vapors passed over a fixed bed containing 1.0 g HZSM-5. The pulses in (A) are for olefins, while the pulses in (B) are for naphthalenes.

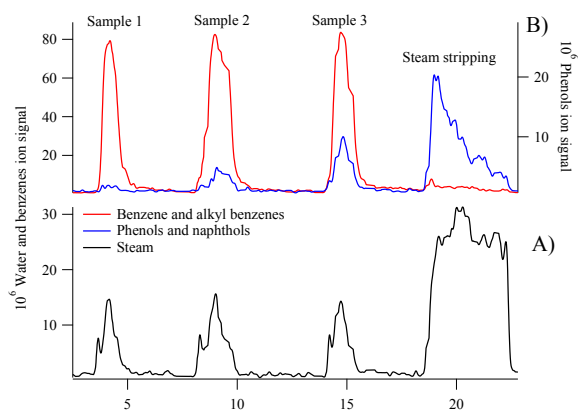

Fig. S2 Ion profiles for CFP of three pine samples followed by steam stripping, A) steam and B) benzenes and phenols and naphthols.

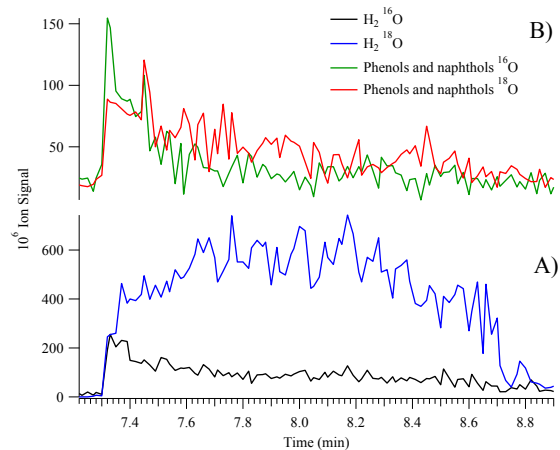

Fig. S3. Ion count profiles recorded when steam (97 %  $^{18}\text{O}$  + 3 %  $^{16}\text{O}$ ) was passed over spent HZSM-5 during CFP of cellulose, A) steam and B) phenol and naphthols.

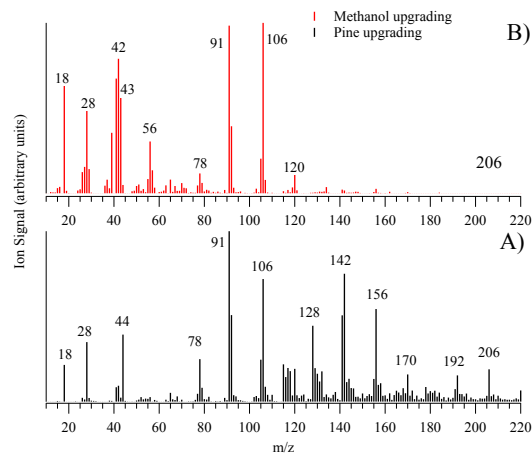

Fig. S4 A). Products observed from passing pine pyrolysis products over a fixed bed of HZSM-5. B) Products observed from upgrading methanol over HZSM-5. The catalytic upgrading temperature for both experiments was 500 °C.

Table S1. Compounds observed by MBMS during vapor phase upgrading of biomass pyrolysis products using HZSM-5 with and without steam ( $\text{H}_2\text{O}$  and  $\text{H}_2^{18}\text{O}$ ).

| m/z     | Compound                                     | GCMS: compound structure     | m/z     | Compound               | GCMS: compound structure |
|---------|----------------------------------------------|------------------------------|---------|------------------------|--------------------------|
| 18      | Water                                        | $\text{H}-\text{O}-\text{H}$ | 122,124 | Dimethyl phenols       |                          |
| 28      | Carbon monoxide                              | $\text{C}\equiv\text{O}$     | 128     | Naphthalene            |                          |
| 44      | Carbon dioxide                               | $\text{O}=\text{C}=\text{O}$ | 132     | Methyl indane          |                          |
| 78      | Benzene                                      |                              | 142     | Methyl naphthalenes    |                          |
| 91      | Toluene                                      |                              | 144,146 | Naphthols              |                          |
| 94,96   | Phenol                                       |                              | 156     | Dimethyl naphthalenes  |                          |
| 106     | Xylenes and ethyl benzene                    |                              | 158,160 | Methyl naphthols       |                          |
| 108,110 | Methyl phenols                               |                              | 170     | Trimethyl naphthalenes |                          |
| 116     | Indene                                       |                              | 178     | Anthracene             |                          |
| 118     | Indane                                       |                              | 192     | Methyl anthracenes     |                          |
| 120     | Trimethyl benzenes and methyl ethyl benzenes |                              | 206     | Dimethyl anthracenes   |                          |
